# Supplementary material for: Altered plasma metabolites and inflammatory networks in HIV-1 infected patients with different immunological responses after long-term antiretroviral therapy
Source: Research Square preprint supplement (doi:10.21203/rs.3.rs-3125493/v1), 2023-07-05
Supplement: Supplementary file 1 [file 5298353e95cf3692f6662c31.docx]

| **Characteristics** | **Immunological non-responders**  **CD4≤350**  **N=25** | **Immunological responders**  **CD4>500**  **N=22** | **Healthy Controls**  **N=25** | ***p*-value** |
| --- | --- | --- | --- | --- |
| Age, mean years (IQR) | 45.8±11.7 | 45.9±11.0 | 44.7±12.4 | 0.925 |
| Male，n (%) | 24 (96.0) | 21 (95.4) | 23 (92.0) | 0.801 |
| Route of transmission，n(%)  Sexual  Blood  Unclear/others | 20 (80)  2 (8.0)  3 (12.0) | 17 (77.3)  2 (9.1)  3 (13.6) | - | 0.974 |
| Initial ART regimen，(%)  2 NRTIs + NNRTI  2NRTIs+PI  2 NRTIs + INSTI  Other | 20 (80.0)  1 (4.0)  4 (16.0)  0 (0.0) | 18 (81.8)  2 (9.2)  1 (4.5)  1 (4.5) | - | 0.384 |
| Switching ART regimen, n (%)  2 NRTIs + NNRTI  2NRTIs+PI  2 NRTIs + INSTI  Other | 17(68.0)  4(16.0)  4(16.0)  0(0.0) | 12 (54.5)  4 (18.2)  4 (18.2)  2 (9.1) | - | 0.473 |
| Viral load (lg copies/mL) | 5.07±0.73 | 5.22±0.71 | - | 0.658 |
| Weight(kg) | 59.8±10.7 | 65.4±10.3 | - | 0.107 |
| Baseline CD3+CD4+T counts (cells/uL ) | 24 (5, 63) | 41 (11, 52) | - | 0.572 |
| Peak CD3+CD4+T counts (cells/uL ) | 244 (201,292) | 630(540,788) |  | <0.001 |

Table S1. Clinical characteristics of patients
