# Supplementary material for: Altered plasma metabolites and inflammatory networks in HIV-1 infected patients with different immunological responses after long-term antiretroviral therapy
Source: Research Square preprint supplement (doi:10.21203/rs.3.rs-3125493/v1), 2023-07-05
Supplement: Supplementary file 2 [file 696e24ceeea9675bfff73a84.xlsx]

## Sheet: B-C
compound	SUPER META PATHWAY	SUB META PATHWAY	HMDB ID	#REF!	upgradate
maleate	Lipid	Fatty Acid, Dicarboxylate	HMDB0000176	0.008012	down
stearoylcholine*	Lipid	Fatty Acid Metabolism (Acyl Choline)	HMDB0240648	18.234	up
1-stearoyl-GPS (18:0)*	Lipid	Lysophospholipid	HMDB0061698	27.424	up
inosine 5'-monophosphate (IMP)	Nucleotide	Purine Metabolism, (Hypo)Xanthine/Inosine containing	HMDB0000175	15.55	up
serotonin	Amino Acid	Tryptophan Metabolism	HMDB0000259	14.976	up
docosahexaenoylcholine	Lipid	Fatty Acid Metabolism (Acyl Choline)	HMDB0240647	14.458	up
glycerophosphoinositol*	Lipid	Phospholipid Metabolism	NA	13.318	up
1-stearoyl-2-oleoyl-GPS (18:0/18:1)	Lipid	Phosphatidylserine (PS)	HMDB0010163	9.4863	up
leucylglycine	Peptide	Dipeptide	HMDB0028929	10.49	up
oleoylcholine	Lipid	Fatty Acid Metabolism (Acyl Choline)	HMDB0240596	7.5492	up
5-hydroxyhexanoate	Lipid	Fatty Acid, Monohydroxy	HMDB0000525	0.18468	down
5alpha-androstan-3beta,17beta-diol monosulfate (2)	Lipid	Androgenic Steroids	NA	0.22455	down
N-acetylhistamine	Amino Acid	Histidine Metabolism	HMDB0013253	13.03	up
1-palmitoyl-GPI (16:0)	Lipid	Lysophospholipid	HMDB0061695	5.1376	up
UMP	Nucleotide	Pyrimidine Metabolism, Uracil containing	HMDB0000288	8.1863	up
5alpha-pregnan-diol disulfate	Lipid	Progestin Steroids	HMDB0240581	0.24183	down
ADP	Nucleotide	Purine metabolism	HMDB0001341	11.631	up
glycerophosphoserine*	Lipid	Phospholipid Metabolism	NA	7.8776	up
arachidonoylcholine	Lipid	Fatty Acid Metabolism (Acyl Choline)	HMDB0240583	6.14	up
palmitoylcholine	Lipid	Fatty Acid Metabolism (Acyl Choline)	HMDB0240592	5.501	up
maltotetraose	Carbohydrate	Glycogen Metabolism	HMDB0001296	17.192	up
5alpha-pregnan-3beta,20alpha-diol monosulfate (2)	Lipid	Progestin Steroids	NA	0.2704	down
linoleoylcholine*	Lipid	Fatty Acid Metabolism (Acyl Choline)	HMDB0013213	5.1095	up
sebacate (C10-DC)	Lipid	Fatty Acid, Dicarboxylate	HMDB0000792	0.32845	down
5alpha-androstan-3alpha,17beta-diol monosulfate (1)	Lipid	Androgenic Steroids	NA	0.27304	down
adenosine 5'-diphosphoribose (ADP-ribose)	Cofactors and Vitamins	Nicotinate and Nicotinamide Metabolism	HMDB0001178	5.1156	up
1-stearoyl-2-arachidonoyl-GPS (18:0/20:4)	Lipid	Phosphatidylserine (PS)	HMDB0012383	4.5713	up
5alpha-androstan-3alpha,17alpha-diol monosulfate	Lipid	Androgenic Steroids	HMDB0000412	0.26676	down
5alpha-androstan-3beta,17alpha-diol disulfate	Lipid	Androgenic Steroids	HMDB0094682	0.33638	down
5alpha-pregnan-3beta,20beta-diol monosulfate (1)	Lipid	Progestin Steroids	HMDB0240580	0.25935	down
cytosine	Nucleotide	Pyrimidine Metabolism, Cytidine containing	HMDB0000630	2.9817	up
cytidine	Nucleotide	Pyrimidine Metabolism, Cytidine containing	HMDB0000089	2.8176	up
cysteine-glutathione disulfide	Amino Acid	Glutathione Metabolism	HMDB0000656	0.3382	down
N-stearoyl-sphinganine (d18:0/18:0)*	Lipid	Dihydroceramides	HMDB0011761	4.4386	up
cysteinylglycine	Amino Acid	Glutathione Metabolism	HMDB0000078	0.32934	down
corticosterone	Lipid	Corticosteroids	HMDB0001547	0.40521	down
maltotriose	Carbohydrate	Glycogen Metabolism	HMDB0001262	4.361	up
5alpha-pregnan-3beta,20alpha-diol disulfate	Lipid	Progestin Steroids	HMDB0094650	0.33243	down
androsterone sulfate	Lipid	Androgenic Steroids	HMDB0002759	0.32426	down
epiandrosterone sulfate	Lipid	Androgenic Steroids	HMDB0062657	0.34473	down
dihydroorotate	Nucleotide	Pyrimidine Metabolism, Orotate containing	HMDB0003349	0.4504	down
1-palmitoleoylglycerol (16:1)*	Lipid	Monoacylglycerol	HMDB0011565	3.6405	up
tyramine O-sulfate	Amino Acid	Tyrosine Metabolism	HMDB0006409	4.7519	up
1-stearoyl-GPI (18:0)	Lipid	Lysophospholipid	HMDB0240261	3.0165	up
3b-hydroxy-5-cholenoic acid	Lipid	Secondary Bile Acid Metabolism	HMDB0000308	0.48153	down
S-methylmethionine	Amino Acid	Methionine, Cysteine, SAM and Taurine Metabolism	HMDB0038670	0.40953	down
hypoxanthine	Nucleotide	Purine Metabolism, (Hypo)Xanthine/Inosine containing	HMDB0000157	0.4609	down
1-arachidonylglycerol (20:4)	Lipid	Monoacylglycerol	HMDB0011578	2.2994	up
glycerol 3-phosphate	Lipid	Glycerolipid Metabolism	HMDB0000126	0.4636	down
ribulonate/xylulonate*	Carbohydrate	Pentose Metabolism	HMDB0060255	2.5866	up
androstenediol (3alpha, 17alpha) monosulfate (3)	Lipid	Androgenic Steroids	NA	0.39035	down
prolylglycine	Peptide	Dipeptide	HMDB0011178	2.3497	up
1-oleoyl-GPI (18:1)*	Lipid	Lysophospholipid	HMDB0061693	2.6814	up
gamma-glutamylserine	Peptide	Gamma-glutamyl Amino Acid	HMDB0029158	0.4132	down
chiro-inositol	Lipid	Inositol Metabolism	HMDB0034220	8.3753	up
5alpha-androstan-3beta,17beta-diol disulfate	Lipid	Androgenic Steroids	HMDB0094682	0.44839	down
N-acetylaspartate (NAA)	Amino Acid	Alanine and Aspartate Metabolism	HMDB0000812	0.42225	down
1-linoleoyl-GPI (18:2)*	Lipid	Lysophospholipid	HMDB0240597	2.3818	up
sarcosine	Amino Acid	Glycine, Serine and Threonine Metabolism	HMDB0000271	0.43545	down
inosine	Nucleotide	Purine Metabolism, (Hypo)Xanthine/Inosine containing	HMDB0000195	0.48769	down
andro steroid monosulfate C19H28O6S (1)*	Lipid	Androgenic Steroids	NA	2.2354	up
1-arachidonoyl-GPI (20:4)*	Lipid	Lysophospholipid	HMDB0061690	2.3008	up
sphingosine	Lipid	Sphingosines	HMDB0000252	2.2575	up
phosphoethanolamine	Lipid	Phospholipid Metabolism	HMDB0000224	2.3234	up
eicosapentaenoate (EPA; 20:5n3)	Lipid	Long Chain Polyunsaturated Fatty Acid (n3 and n6)	HMDB0001999	2.3121	up
suberoylcarnitine (C8-DC)	Lipid	Fatty Acid Metabolism (Acyl Carnitine, Dicarboxylate)	NA	2.1582	up
sphinganine	Lipid	Sphingolipid Synthesis	HMDB0000269	2.1373	up
dihomo-linolenate (20:3n3 or n6)	Lipid	Long Chain Polyunsaturated Fatty Acid (n3 and n6)	HMDB0002925	2.034	up
phenol glucuronide	Amino Acid	Tyrosine Metabolism	HMDB0060014	2.3433	up
hexanoylglycine	Lipid	Fatty Acid Metabolism (Acyl Glycine)	HMDB0000701	2.9748	up
N-methylhydroxyproline**	Amino Acid	Urea cycle; Arginine and Proline Metabolism	NA	2.1012	up
pregnanediol-3-glucuronide	Lipid	Progestin Steroids	HMDB0010318	0.49625	down
N-acetylcitrulline	Amino Acid	Urea cycle; Arginine and Proline Metabolism	HMDB0000856	2.7298	up
maltose	Carbohydrate	Glycogen Metabolism	HMDB0000163	2.288	up
glycochenodeoxycholate glucuronide (1)	Lipid	Primary Bile Acid Metabolism	HMDB0002579	2.4514	up
nisinate (24:6n3)	Lipid	Long Chain Polyunsaturated Fatty Acid (n3 and n6)	HMDB0002007	2.3108	up
3-methoxytyramine sulfate	Amino Acid	Tyrosine Metabolism	NA	2.6854	up
N-methylproline	Amino Acid	Urea cycle; Arginine and Proline Metabolism	HMDB0094696	2.3639	up

## Sheet: A1-A2
compound	SUPER META PATHWAY	SUB META PATHWAY	HMDB ID	#REF!	updown
maltotetraose	Carbohydrate	Glycogen Metabolism	HMDB0001296	-1.0662	down
dihydroorotate	Nucleotide	Pyrimidine Metabolism, Orotate containing	HMDB0003349	1.3514	up
beta-cryptoxanthin	Cofactors and Vitamins	Vitamin A Metabolism	HMDB0033844	1.0779	up

## Sheet: B1-B2
COMPOUND Name	SUPER META PATHWAY	SUB META PATHWAY	ACQUISITION METHOD	HMDB ID	log2(FC)	updwon
decadienedioic acid (C10:2-DC)	Lipid	Fatty Acid, Dicarboxylate	NEGb	NA	1.1245	up
N,N-dimethyl-5-aminovalerate	Amino Acid	Lysine Metabolism	POSa	NA	-1.9081	down
maltotetraose	Carbohydrate	Glycogen Metabolism	NEGa	HMDB0001296	-1.225	down

## Sheet: A-B
compound	SUPER META PATHWAY	SUB META PATHWAY	ACQUISITION METHOD	HMDB ID	#REF!	updown
quinolinate	Cofactors and Vitamins	Nicotinate and Nicotinamide Metabolism	NEGb	HMDB0000232	1.6217	up
glycocholenate sulfate*	Lipid	Secondary Bile Acid Metabolism	NEGa	NA	1.4668	up
3-ureidopropionate	Nucleotide	Pyrimidine Metabolism, Uracil containing	POSa	HMDB0000026	1.2176	up
glycochenodeoxycholate 3-sulfate	Lipid	Primary Bile Acid Metabolism	NEGa	HMDB0002497	2.776	up
androstenediol (3alpha, 17alpha) monosulfate (3)	Lipid	Androgenic Steroids	NEGa	NA	1.1973	up
2'-deoxyuridine	Nucleotide	Pyrimidine Metabolism, Uracil containing	NEGa	HMDB0000012	-1.3315	down
5alpha-pregnan-diol disulfate	Lipid	Progestin Steroids	NEGa	HMDB0240581	2.3911	up
tetrahydrocortisone glucuronide (5)	Lipid	Corticosteroids	NEGa	NA	-1.1173	down
taurochenodeoxycholic acid 3-sulfate	Lipid	Secondary Bile Acid Metabolism	NEGa	HMDB0002486	3.5637	up
picolinate	Amino Acid	Tryptophan Metabolism	POSa	HMDB0002243	1.0285	up
nisinate (24:6n3)	Lipid	Long Chain Polyunsaturated Fatty Acid (n3 and n6)	NEGa	HMDB0002007	-1.3577	down
N-carbamoylaspartate	Nucleotide	Pyrimidine Metabolism, Orotate containing	NEGa	HMDB0000828	-1.0829	down
1-stearoyl-2-oleoyl-GPS (18:0/18:1)	Lipid	Phosphatidylserine (PS)	NEGa	HMDB0010163	1.0572	up
formiminoglutamate	Amino Acid	Histidine Metabolism	NEGa	HMDB0000854	1.2396	up
4-hydroxyphenylacetatoylcarnitine	Amino Acid	Tyrosine Metabolism	NEGa	NA	1.0684	up
5alpha-androstan-3beta,17beta-diol disulfate	Lipid	Androgenic Steroids	NEGa	HMDB0094682	1.1576	up
5-hydroxyhexanoate	Lipid	Fatty Acid, Monohydroxy	NEGa	HMDB0000525	1.0329	up
taurocholenate sulfate*	Lipid	Secondary Bile Acid Metabolism	NEGa	NA	1.5394	up
3-carboxy-4-methyl-5-propyl-2-furanpropanoate (CMPF)	Lipid	Fatty Acid, Dicarboxylate	NEGa	HMDB0061112	-1.2737	down
palmitoleoyl-arachidonoyl-glycerol (16:1/20:4) [2]*	Lipid	Diacylglycerol	NEGa	NA	-1.238	down
5alpha-androstan-3alpha,17alpha-diol monosulfate	Lipid	Androgenic Steroids	NEGa	HMDB0000412	1.327	up
5alpha-androstan-3beta,17beta-diol monosulfate (2)	Lipid	Androgenic Steroids	NEGa	NA	1.3022	up
sebacate (C10-DC)	Lipid	Fatty Acid, Dicarboxylate	NEGa	HMDB0000792	1.2267	up
3b-hydroxy-5-cholenoic acid	Lipid	Secondary Bile Acid Metabolism	NEGa	HMDB0000308	1.1357	up
N-stearoyl-sphinganine (d18:0/18:0)*	Lipid	Dihydroceramides	NEGa	HMDB0011761	1.3133	up
glycoursodeoxycholic acid sulfate (1)	Lipid	Secondary Bile Acid Metabolism	NEGa	NA	1.5445	up
glycodeoxycholate glucuronide (1)	Lipid	Secondary Bile Acid Metabolism	NEGa	NA	3.5151	up
maltotetraose	Carbohydrate	Glycogen Metabolism	NEGa	HMDB0001296	1.1469	up
tauroursodeoxycholic acid sulfate (1)	Lipid	Secondary Bile Acid Metabolism	NEGa	NA	3.1255	up
5alpha-pregnan-3beta,20alpha-diol disulfate	Lipid	Progestin Steroids	NEGa	HMDB0094650	1.3608	up
phenylacetylcarnitine	Peptide	Acetylated Peptides	NEGa	NA	1.6662	up
glycodeoxycholate	Lipid	Secondary Bile Acid Metabolism	NEGa	HMDB0000631	-1.006	down
phenylacetate	Amino Acid	Phenylalanine Metabolism	NEGa	HMDB0000209	1.1062	up
acetoacetate	Lipid	Ketone Bodies	NEGa	HMDB0000060	1.3696	up
Fibrinopeptide A, phosphono-ser(3)*	Peptide	Fibrinogen Cleavage Peptide	NEGa	NA	3.7684	up
taurochenodeoxycholate	Lipid	Primary Bile Acid Metabolism	NEGa	HMDB0000951	1.6497	up
5alpha-androstan-3alpha,17beta-diol monosulfate (1)	Lipid	Androgenic Steroids	NEGa	NA	1.1262	up
taurocholate	Lipid	Primary Bile Acid Metabolism	NEGa	HMDB0000036	2.6221	up

## Sheet: A-C
compound	SUPER META PATHWAY	SUB META PATHWAY	ACQUISITION METHOD	HMDB ID	log2(FC)	updown
maleate	Lipid	Fatty Acid, Dicarboxylate	NEGb	HMDB0000176	-6.8307	down
1-stearoyl-GPS (18:0)*	Lipid	Lysophospholipid		HMDB0061698	4.9565	up
1-stearoyl-2-oleoyl-GPS (18:0/18:1)	Lipid	Phosphatidylserine (PS)		HMDB0010163	3.9152	up
stearoylcholine*	Lipid	Fatty Acid Metabolism (Acyl Choline)		HMDB0240648	4.5266	up
sphinganine	Lipid	Sphingolipid Synthesis		HMDB0000269	1.6936	up
adenosine 5'-diphosphoribose (ADP-ribose)	Cofactors and Vitamins	Nicotinate and Nicotinamide Metabolism		HMDB0001178	2.8908	up
5-methyluridine (ribothymidine)	Nucleotide	Pyrimidine Metabolism, Uracil containing		HMDB0000884	-1.0821	down
gamma-glutamylserine	Peptide	Gamma-glutamyl Amino Acid		HMDB0029158	-1.284	down
inosine 5'-monophosphate (IMP)	Nucleotide	Purine Metabolism, (Hypo)Xanthine/Inosine containing		HMDB0000175	4.1029	up
serotonin	Amino Acid	Tryptophan Metabolism		HMDB0000259	4.332	up
phosphoethanolamine	Lipid	Phospholipid Metabolism		HMDB0000224	1.6932	up
glycerophosphoinositol*	Lipid	Phospholipid Metabolism		NA	3.2425	up
sphingosine	Lipid	Sphingosines		HMDB0000252	1.699	up
1-stearoyl-2-arachidonoyl-GPS (18:0/20:4)	Lipid	Phosphatidylserine (PS)		HMDB0012383	2.5253	up
biliverdin	Cofactors and Vitamins	Hemoglobin and Porphyrin Metabolism		HMDB0001008	-1.3504	down
oleoylcholine	Lipid	Fatty Acid Metabolism (Acyl Choline)		HMDB0240596	2.5491	up
beta-citrylglutamate	Amino Acid	Glutamate Metabolism		HMDB0013220	1.6439	up
cytidine	Nucleotide	Pyrimidine Metabolism, Cytidine containing		HMDB0000089	2.0733	up
linoleoylcholine*	Lipid	Fatty Acid Metabolism (Acyl Choline)		HMDB0013213	2.0183	up
glycerophosphoserine*	Lipid	Phospholipid Metabolism		NA	3.7371	up
2'-deoxyuridine	Nucleotide	Pyrimidine Metabolism, Uracil containing		HMDB0000012	-1.9452	down
arachidonoylcarnitine (C20:4)	Lipid	Fatty Acid Metabolism (Acyl Carnitine, Polyunsaturated)		HMDB0006455	-1.1788	down
N-acetylneuraminate	Carbohydrate	Aminosugar Metabolism		HMDB0000230	1.0929	up
arachidonoylcholine	Lipid	Fatty Acid Metabolism (Acyl Choline)		HMDB0240583	1.9912	up
UMP	Nucleotide	Pyrimidine Metabolism, Uracil containing		HMDB0000288	3.3841	up
(N(1) + N(8))-acetylspermidine	Amino Acid	Polyamine Metabolism		HMDB0001276	1.0866	up
maltotetraose	Carbohydrate	Glycogen Metabolism		HMDB0001296	5.4887	up
docosahexaenoylcholine	Lipid	Fatty Acid Metabolism (Acyl Choline)		HMDB0240647	3.1549	up
maltotriose	Carbohydrate	Glycogen Metabolism		HMDB0001262	2.9503	up
gamma-glutamyl-2-aminobutyrate	Peptide	Gamma-glutamyl Amino Acid		NA	-1.0745	down
leucylglycine	Peptide	Dipeptide		HMDB0028929	3.1367	up
glycerol 3-phosphate	Lipid	Glycerolipid Metabolism		HMDB0000126	-1.5783	down
cysteinylglycine	Amino Acid	Glutathione Metabolism		HMDB0000078	-1.5181	down
dihydroorotate	Nucleotide	Pyrimidine Metabolism, Orotate containing		HMDB0003349	-1.986	down
palmitoylcholine	Lipid	Fatty Acid Metabolism (Acyl Choline)		HMDB0240592	2.2813	up
bilirubin (Z,Z)	Cofactors and Vitamins	Hemoglobin and Porphyrin Metabolism		HMDB0000054	-1.0631	down
1-linoleoyl-GPI (18:2)*	Lipid	Lysophospholipid		HMDB0240597	1.3063	up
ribulonate/xylulonate*	Carbohydrate	Pentose Metabolism		HMDB0060255	1.375	up
maltose	Carbohydrate	Glycogen Metabolism		HMDB0000163	1.7871	up
tetrahydrocortisone glucuronide (5)	Lipid	Corticosteroids		NA	-1.5908	down
N-stearoyl-sphinganine (d18:0/18:0)*	Lipid	Dihydroceramides		HMDB0011761	3.4556	up
5-hydroxyhexanoate	Lipid	Fatty Acid, Monohydroxy		HMDB0000525	-1.4136	down
N-palmitoyl-sphinganine (d18:0/16:0)	Lipid	Dihydroceramides		HMDB0011760	1.8078	up
ADP	Nucleotide	Purine metabolism		HMDB0001341	3.8352	up
cortolone glucuronide (1)	Lipid	Corticosteroids		NA	-1.4274	down
2-methylserine	Amino Acid	Glycine, Serine and Threonine Metabolism		NA	-1.0201	down
3-methoxytyramine sulfate	Amino Acid	Tyrosine Metabolism		NA	2.0999	up
cytosine	Nucleotide	Pyrimidine Metabolism, Cytidine containing		HMDB0000630	1.8326	up
11beta-hydroxyandrosterone glucuronide	Lipid	Androgenic Steroids		HMDB0010351	-1.458	down
1-palmitoyl-GPI (16:0)	Lipid	Lysophospholipid		HMDB0061695	2.1172	up
1-oleoyl-GPI (18:1)*	Lipid	Lysophospholipid		HMDB0061693	1.3631	up
androsterone glucuronide	Lipid	Androgenic Steroids		HMDB0002829	-1.3848	down
N-lactoyl leucine	Amino Acid	Leucine, Isoleucine and Valine Metabolism		HMDB0062176	-1.2971	down
3-ureidopropionate	Nucleotide	Pyrimidine Metabolism, Uracil containing		HMDB0000026	1.4237	up
bilirubin (E,E)*	Cofactors and Vitamins	Hemoglobin and Porphyrin Metabolism		HMDB0240584	-1.0171	down
gamma-glutamyltryptophan	Peptide	Gamma-glutamyl Amino Acid		HMDB0029160	-1.0287	down
taurochenodeoxycholic acid 3-sulfate	Lipid	Secondary Bile Acid Metabolism		HMDB0002486	4.8938	up
4-methylnonanoylcarnitine	Lipid	Fatty Acid Metabolism (Acyl Carnitine, Medium Chain)		NA	-1.5823	down
xanthurenate	Amino Acid	Tryptophan Metabolism		HMDB0000881	-1.1852	down
1-stearoyl-GPI (18:0)	Lipid	Lysophospholipid		HMDB0240261	1.0969	up
cysteine-glutathione disulfide	Amino Acid	Glutathione Metabolism		HMDB0000656	-1.5525	down
5alpha-pregnan-3beta,20alpha-diol monosulfate (2)	Lipid	Progestin Steroids		NA	-1.1065	down
glycochenodeoxycholate 3-sulfate	Lipid	Primary Bile Acid Metabolism		HMDB0002497	3.1642	up
5alpha-androstan-3beta,17alpha-diol disulfate	Lipid	Androgenic Steroids		HMDB0094682	-1.2188	down
1-oleoyl-2-linoleoyl-GPE (18:1/18:2)*	Lipid	Phosphatidylethanolamine (PE)		HMDB0009060	1.0557	up
3-carboxy-4-methyl-5-propyl-2-furanpropanoate (CMPF)	Lipid	Fatty Acid, Dicarboxylate		HMDB0061112	-1.0799	down
4-hydroxyphenylacetatoylcarnitine	Amino Acid	Tyrosine Metabolism		NA	1.3321	up
suberoylcarnitine (C8-DC)	Lipid	Fatty Acid Metabolism (Acyl Carnitine, Dicarboxylate)		NA	1.5634	up
N-lactoyl isoleucine	Amino Acid	Leucine, Isoleucine and Valine Metabolism		HMDB0062180	-1.0184	down
phenylacetate	Amino Acid	Phenylalanine Metabolism		HMDB0000209	1.7696	up
isoursodeoxycholate	Lipid	Secondary Bile Acid Metabolism		HMDB0000686	-1.1177	down
N-carbamoylvaline	Amino Acid	Leucine, Isoleucine and Valine Metabolism		0	-1.0312	down
hydantoin-5-propionate	Amino Acid	Histidine Metabolism		HMDB0001212	1.3328	up
acetoacetate	Lipid	Ketone Bodies		HMDB0000060	2.2004	up
taurocholate	Lipid	Primary Bile Acid Metabolism		HMDB0000036	3.061	up
glycocholate	Lipid	Primary Bile Acid Metabolism		HMDB0000138	2.1525	up
N-methylproline	Amino Acid	Urea cycle; Arginine and Proline Metabolism		HMDB0094696	2.2206	up
HWESASXX*	Peptide	Polypeptide		NA	1.9858	up
tyramine O-sulfate	Amino Acid	Tyrosine Metabolism		HMDB0006409	2.7675	up
N-methylhydroxyproline**	Amino Acid	Urea cycle; Arginine and Proline Metabolism		NA	1.7615	up
1-palmitoleoylglycerol (16:1)*	Lipid	Monoacylglycerol		HMDB0011565	1.1948	up
N-acetylhistamine	Amino Acid	Histidine Metabolism		HMDB0013253	3.2219	up
sucrose	Carbohydrate	Disaccharides and Oligosaccharides		HMDB0000258	2.4539	up
allantoic acid	Nucleotide	Purine Metabolism, (Hypo)Xanthine/Inosine containing		HMDB0001209	-1.0392	down
taurochenodeoxycholate	Lipid	Primary Bile Acid Metabolism		HMDB0000951	2.4792	up
