# Supplementary material for: Altered plasma metabolites and inflammatory networks in HIV-1 infected patients with different immunological responses after long-term antiretroviral therapy
Source: Research Square preprint supplement (doi:10.21203/rs.3.rs-3125493/v1), 2023-07-05
Supplement: Supplementary file 3 [file d12c4a022da4bd5556cb366c.xlsx]

## Sheet: AC
Pathway	Total	Expected	Hits	RawP	LogP	Holm.adjust	FDR	Impact
Pyrimidine metabolism	39	0.70452	5	0.00049906	3.3018	0.041921	0.041921	0.20377
Glycerophospholipid metabolism	36	0.65032	4	0.0033752	2.4717	0.28014	0.14176	0.25666
Sphingolipid metabolism	21	0.37935	3	0.0056511	2.2479	0.46339	0.15823	0.21298
Purine metabolism	65	1.1742	4	0.02702	1.5683	1	0.56742	0.15596
Starch and sucrose metabolism	18	0.32516	2	0.040286	1.3948	1	0.66793	0.12329
Primary bile acid biosynthesis	46	0.83097	3	0.047709	1.3214	1	0.66793	0.02587
Synthesis and degradation of ketone bodies	5	0.090323	1	0.087226	1.0594	1	1	0.6
Porphyrin and chlorophyll metabolism	30	0.54194	2	0.10035	0.99847	1	1	0.12753
Taurine and hypotaurine metabolism	8	0.14452	1	0.13599	0.86649	1	1	0
Phenylalanine metabolism	10	0.18065	1	0.16709	0.77704	1	1	0
Tryptophan metabolism	41	0.74065	2	0.16784	0.7751	1	1	0.10493
Glycosylphosphatidylinositol (GPI)-anchor biosynthesis	14	0.2529	1	0.22609	0.64572	1	1	0.00399
Butanoate metabolism	15	0.27097	1	0.2402	0.61943	1	1	0.11111
Glycerolipid metabolism	16	0.28903	1	0.25406	0.59507	1	1	0.04361
Pantothenate and CoA biosynthesis	19	0.34323	1	0.29419	0.53137	1	1	0.02857
beta-Alanine metabolism	21	0.37935	1	0.31978	0.49515	1	1	0.10448
Galactose metabolism	27	0.48774	1	0.39129	0.4075	1	1	0.03888
Glutathione metabolism	28	0.50581	1	0.40248	0.39525	1	1	0.0568
Valine, leucine and isoleucine degradation	40	0.72258	1	0.52222	0.28215	1	1	0
Tyrosine metabolism	42	0.75871	1	0.53978	0.26778	1	1	0
Steroid hormone biosynthesis	85	1.5355	1	0.79679	0.098656	1	1	0

## Sheet: AB
Pathway	Total	Expected	Hits	RawP	LogP	Holm.adjust	FDR	Impact
Pyrimidine metabolism	39	0.25161	3	0.0015655	2.8053	0.1315	0.1315	0.09607
Synthesis and degradation of ketone bodies	5	0.032258	1	0.031885	1.4964	1	0.93315	0.6
Primary bile acid biosynthesis	46	0.29677	2	0.033327	1.4772	1	0.93315	0.01782
Taurine and hypotaurine metabolism	8	0.051613	1	0.050574	1.2961	1	1	0
Phenylalanine metabolism	10	0.064516	1	0.062852	1.2017	1	1	0
Nicotinate and nicotinamide metabolism	15	0.096774	1	0.092925	1.0319	1	1	0
Butanoate metabolism	15	0.096774	1	0.092925	1.0319	1	1	0.11111
Histidine metabolism	16	0.10323	1	0.098834	1.0051	1	1	0.04918
Pantothenate and CoA biosynthesis	19	0.12258	1	0.11636	0.93421	1	1	0.02857
beta-Alanine metabolism	21	0.13548	1	0.12786	0.89325	1	1	0.10448
Alanine, aspartate and glutamate metabolism	28	0.18065	1	0.16709	0.77704	1	1	0
Glycerophospholipid metabolism	36	0.23226	1	0.20998	0.67783	1	1	0.04701
Valine, leucine and isoleucine degradation	40	0.25806	1	0.23066	0.63702	1	1	0
Tyrosine metabolism	42	0.27097	1	0.24082	0.6183	1	1	0

## Sheet: BC
Pathway	Total	Expected	Hits	RawP	LogP	Holm.adjust	FDR	Impact
Purine metabolism	65	0.92258	5	0.001682	2.7742	0.14129	0.11758	0.17467
Sphingolipid metabolism	21	0.29806	3	0.0027996	2.5529	0.23237	0.11758	0.21298
Glycerophospholipid metabolism	36	0.51097	3	0.013088	1.8831	1	0.3422	0.15217
Pyrimidine metabolism	39	0.55355	3	0.016295	1.7879	1	0.3422	0.1333
Biosynthesis of unsaturated fatty acids	36	0.51097	2	0.090621	1.0428	1	1	0
Glycerolipid metabolism	16	0.2271	1	0.20534	0.68752	1	1	0.04361
Starch and sucrose metabolism	18	0.25548	1	0.22798	0.6421	1	1	0.07306
Pentose and glucuronate interconversions	18	0.25548	1	0.22798	0.6421	1	1	0.14062
Glutathione metabolism	28	0.39742	1	0.33224	0.47855	1	1	0.0568
Alanine, aspartate and glutamate metabolism	28	0.39742	1	0.33224	0.47855	1	1	0.08654
Glycine, serine and threonine metabolism	33	0.46839	1	0.37918	0.42115	1	1	0.09293
Tryptophan metabolism	41	0.58194	1	0.44781	0.34891	1	1	0.10493
Steroid hormone biosynthesis	85	1.2065	1	0.71336	0.14669	1	1	0.02562
